# Supplementary material for: Decoding motor imagery related to major mimetic muscles from electroencephalography
Source: Research Square preprint supplement (doi:10.21203/rs.3.rs-7908162/v1), 2025-11-10
Supplement: Supplementary file 1 [file 2e03beb8ae6b20a11d027e9c.docx]

**Supplementary materials**

**

**

Fig. s1 Spectrograms from partial EEG channels in the KMI and VMI modalities. ERD was predominantly observed in the low frequency range of 0–15 Hz, initiating 0.5–1 seconds after the onset of facial MIs and persisting for about 3 seconds, whereas ERS primarily found in the 20–35 Hz range, commencing simultaneously with ERD but exhibiting a shorter duration.

Table s1 Comparison of performance metrics between KMI and VMI for different facial MIs in two classification scenarios.

| Classification scenario | Performance metric | MI modality | Recall or precision (%) for different facial MIs | | | |
| --- | --- | --- | --- | --- | --- | --- |
| Eyebrow raising | Eye closing | Lip puckering | Grinning |
| Intra-subject | Recall | KMI | 91.03 ± 7.10 | 82.92 ± 10.66 | 80.09 ± 11.82 | 86.67 ± 10.90 |
|  |  | VMI | 80.47 ± 10.54 | 65.53 ± 17.90 | 63.85 ± 17.94 | 73.34 ± 12.58 |
|  |  | *p*-value | 0.00235 | 0.00104 | 0.00319 | 0.00090 |
|  | Precision | KMI | 89.96 ± 8.40 | 83.21 ± 9.41 | 81.69 ± 12.07 | 86.17 ± 8.95 |
|  |  | VMI | 77.20 ± 14.14 | 63.16 ± 14.48 | 65.41 ± 14.69 | 78.10 ± 14.16 |
|  |  | *p*-value | 0.00284 | 1.6217e−5 | 0.00151 | 0.01516 |
| Cross-subject | Recall | KMI | 66.28 ± 8.82 | 49.00 ± 12.31 | 60.12 ± 12.12 | 72.07 ± 17.68 |
|  |  | VMI | 46.39 ± 11.40 | 45.08 ± 11.58 | 40.68 ± 11.78 | 43.98 ± 12.58 |
|  |  | *p*-value | 2.9523e−7 | ns | 0.0002 | 1.6416e−5 |
|  | Precision | KMI | 75.97 ± 11.15 | 64.57 ± 10.57 | 64.80 ± 14.58 | 67.69 ± 15.19 |
|  |  | VMI | 48.00 ± 10.78 | 44.35 ± 14.05 | 38.97 ± 12.12 | 43.85 ± 14.51 |
|  |  | *p*-value | 2.3726e−6 | 4.9043e−6 | 1.6738e−5 | 2.2329e−5 |


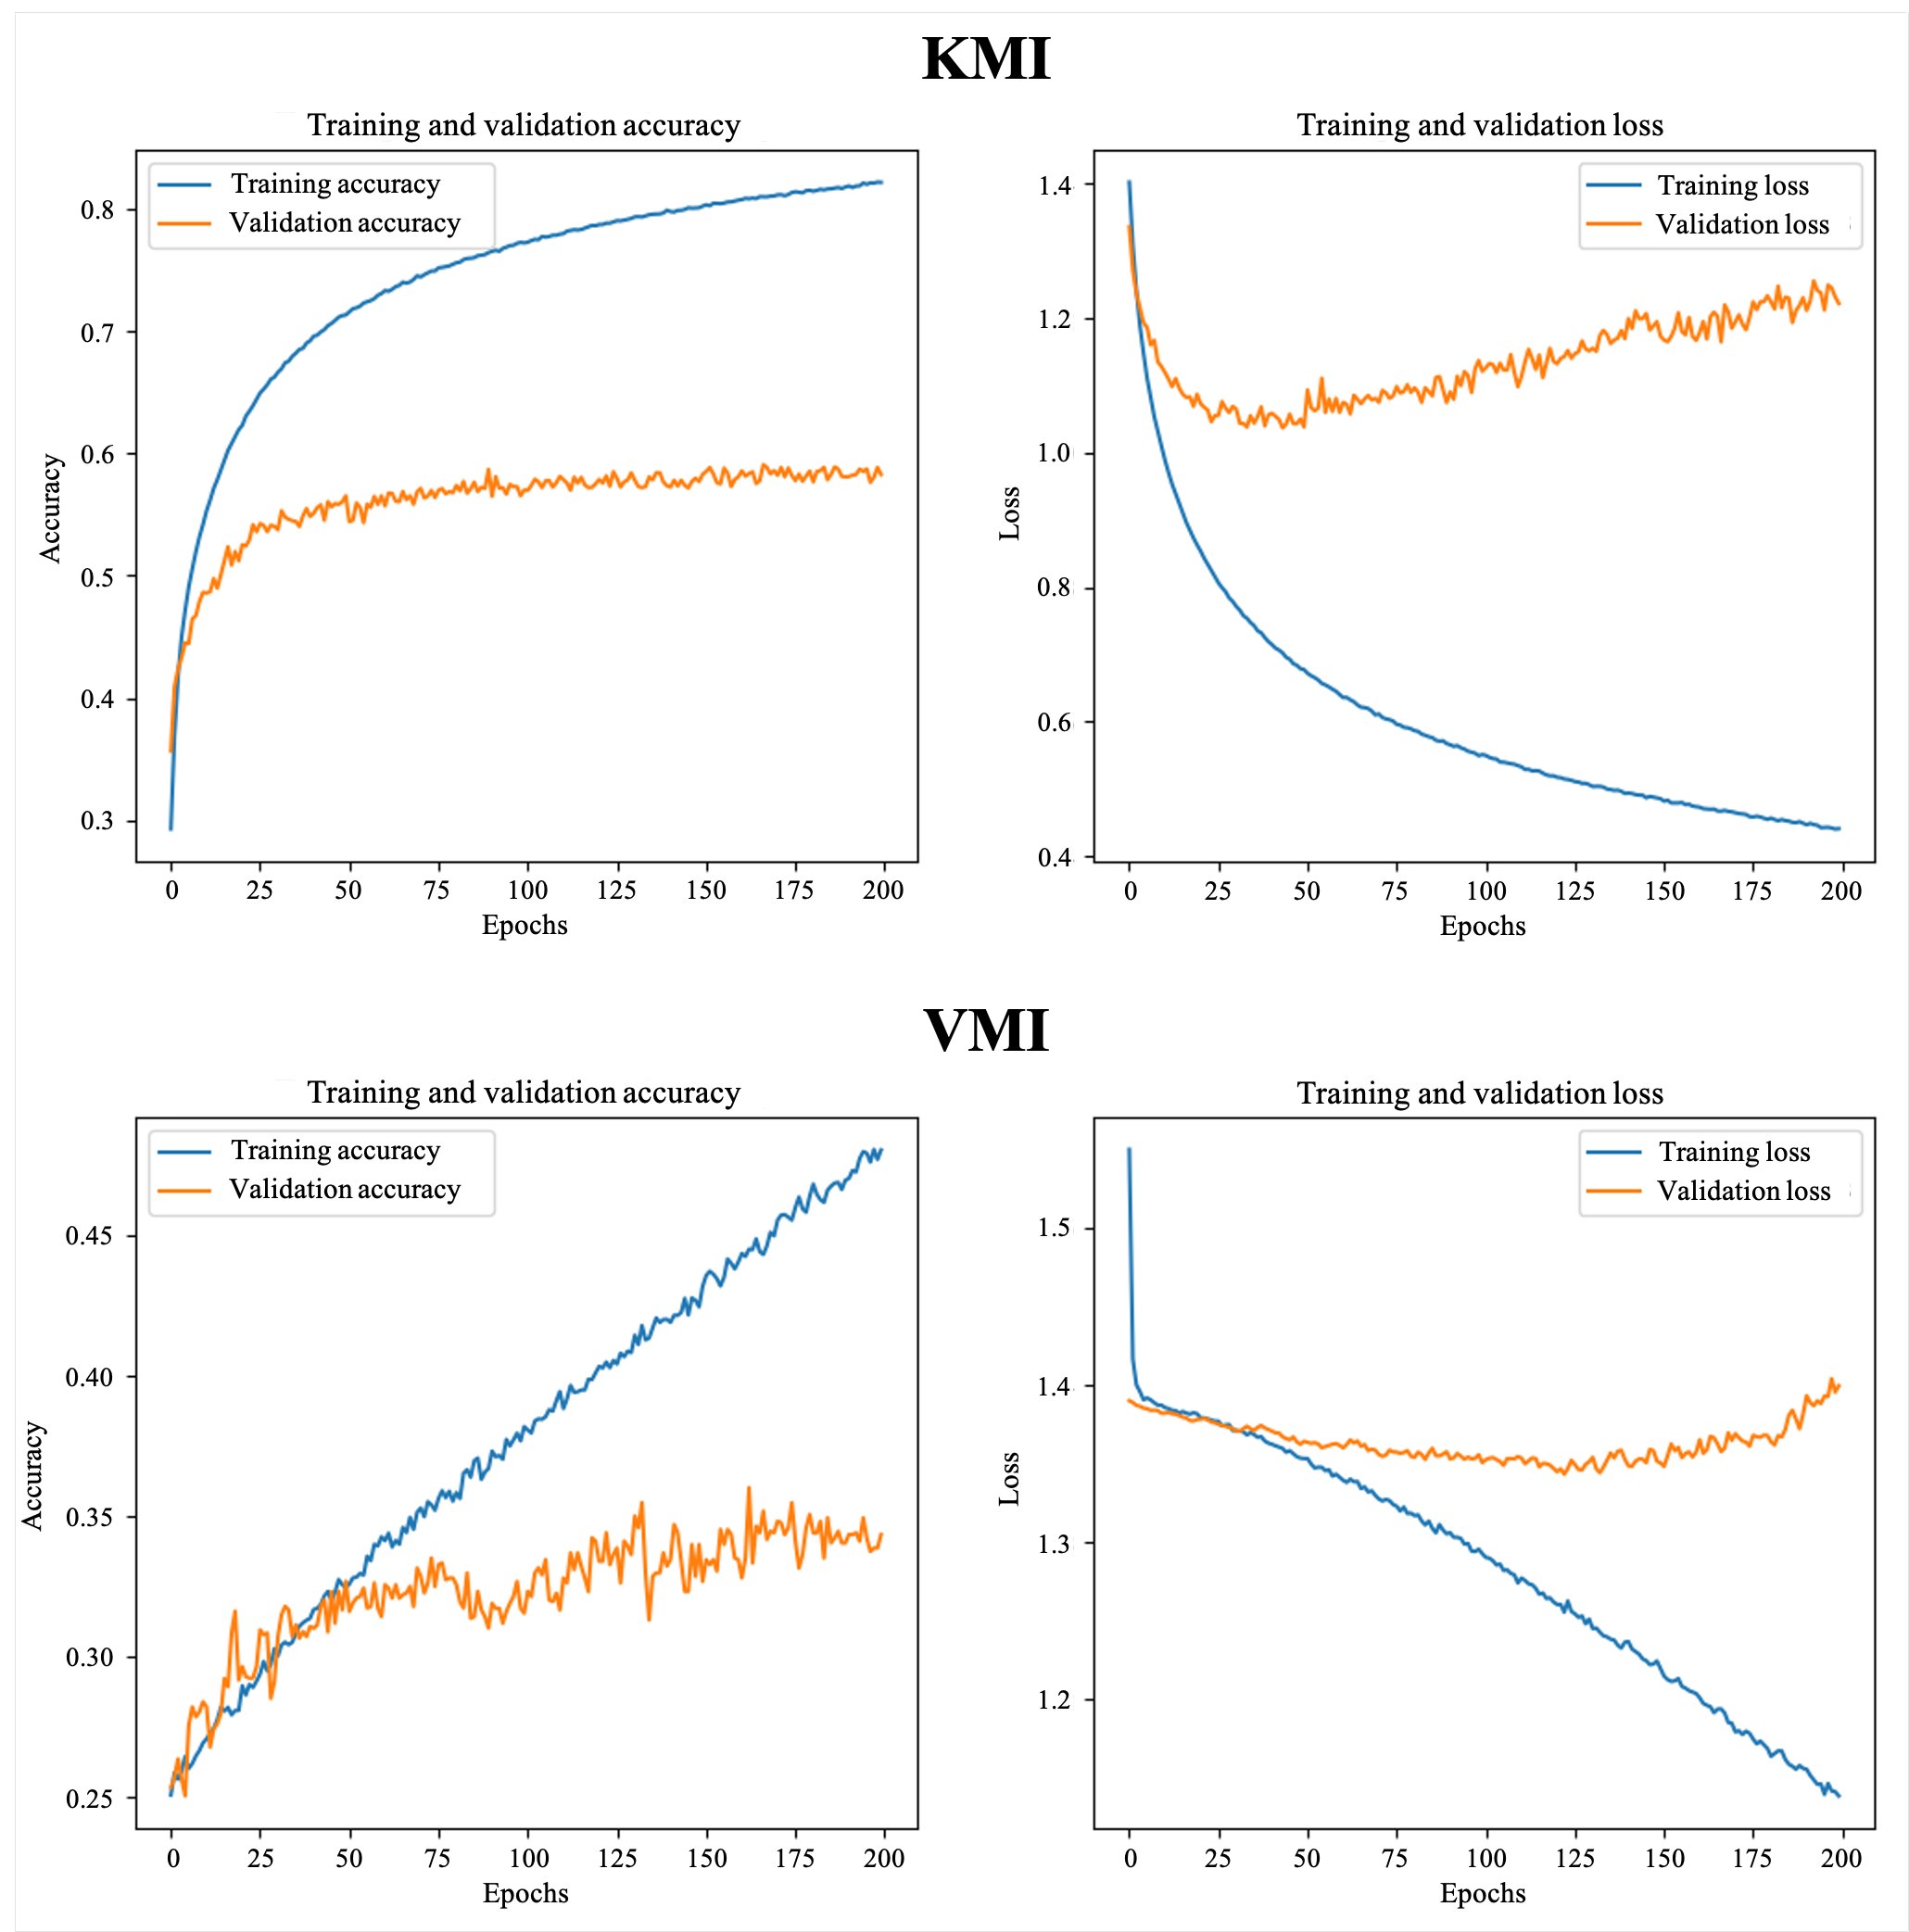


Fig. s2 The accuracy and loss curves for KMI and VMI cross-subject classification. In both conditions, training accuracy improving while validation accuracy plateaued or fluctuated at a lower level. Validation loss increased after a certain point despite decreasing training loss, indicating model overfitting and limited generalization for both KMI and VMI tasks.

Table s2 EEG channels’ classification weights under different conditions.

| EEG channel | Classification weight under different conditions | | |
| --- | --- | --- | --- |
| KMI classification for healthy participants | VMI classification for healthy participants | KMI classification for patients |
| Fp1 | 1.68 | 1.22 | 1.81 |
| F7 | 0.07 | 0.43 | -1.29 |
| T3 | -0.25 | -1.03 | -0.79 |
| T5 | 0.52 | -0.68 | -0.26 |
| O1 | -1.28 | -0.27 | 0.89 |
| F3 | 1.14 | 1.23 | 0.52 |
| C3 | -0.92 | -1.14 | -1.08 |
| P3 | -0.11 | 0.53 | 1.56 |
| Fz | 0.61 | -0.73 | -0.82 |
| Cz | -0.29 | -1.44 | 0.74 |
| Fp2 | 1.50 | 0.84 | -1.11 |
| F8 | -1.55 | -2.26 | -0.32 |
| T4 | 0.61 | 0.25 | -0.06 |
| T6 | 0.43 | 1.06 | 1.30 |
| O2 | 0.11 | 0.32 | 0.33 |
| F4 | -0.20 | 0.65 | -1.17 |
| C4 | -0.83 | 1.19 | 0.01 |
| P4 | 0.78 | 0.04 | -0.59 |
| Pz | -2.00 | -0.22 | 1.55 |

Table s3 Characteristics of the patients.

| Patient no. | Age (years), sex | Affected side | Etiology | Duration (weeks) | FNGS 2.0 | | | |
| --- | --- | --- | --- | --- | --- | --- | --- | --- |
| Brow | Eye | NLF | Oral |
| 1 | 33, M | Right | Parotidectomy | 6 | 6 | 3 | 2 | 5 |
| 2 | 60, M | Right | Parotidectomy | 2 | 2 | 2 | 6 | 5 |
| 3 | 48, M | Left | Parotid MT | 12 | 1 | 1 | 3 | 1 |
| 4 | 21, M | Left | Trauma | 80 | 6 | 1 | 1 | 2 |
| 5 | 43, M | Right | Trauma | 4 | 6 | 4 | 3 | 4 |
| 6 | 62, F | Right | Parotidectomy | 8 | 4 | 6 | 3 | 3 |

MT, malignant tumor; NLF, nasolabial fold.


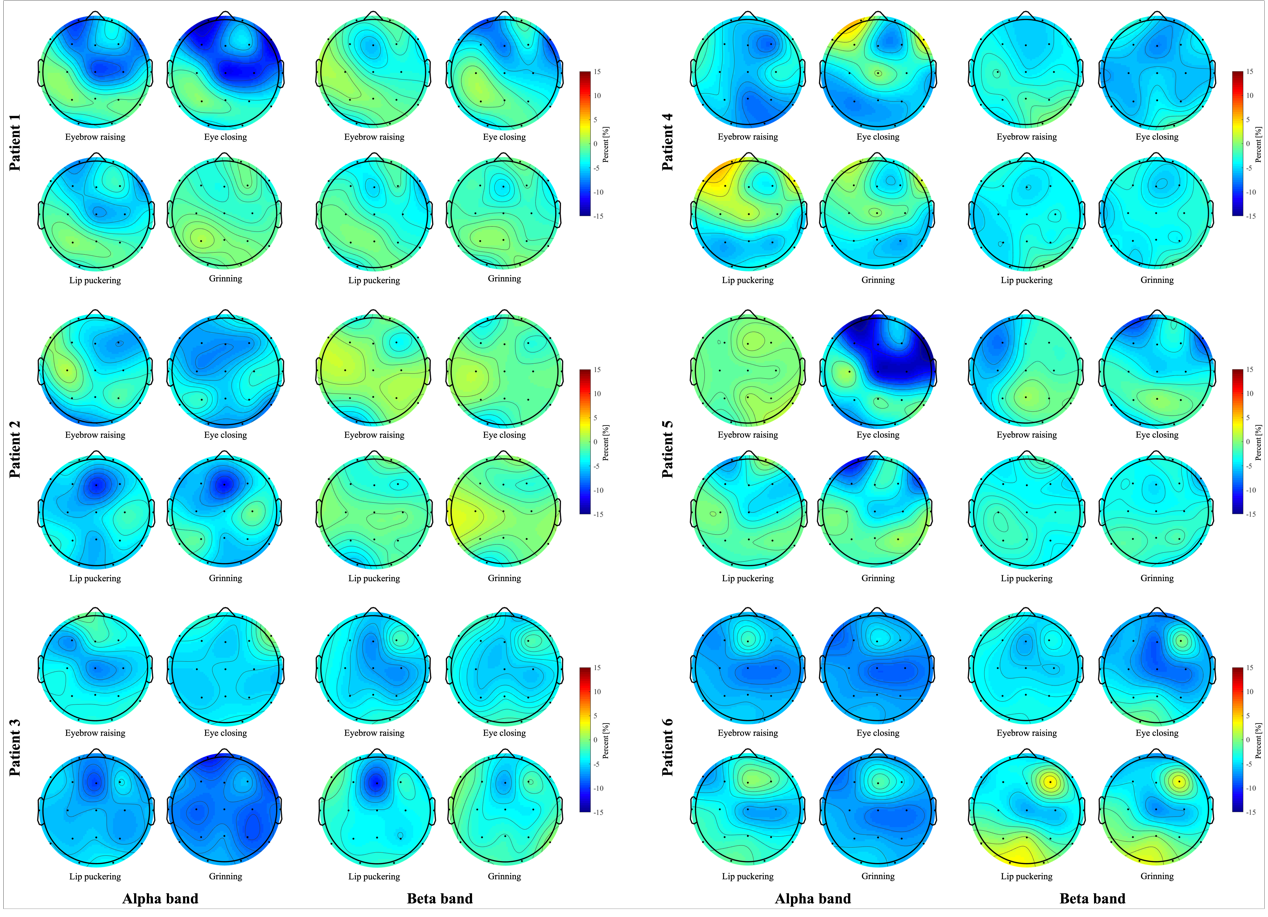


Fig. s3 Patients’ ERD/ERS topographical maps during different facial MIs. Compared with healthy participants who showed consistent ERD patterns, patients exhibited notable variability in their EEG features. In cases of severely impaired facial movements, reduced activity was observed in the left prefrontal region, while some patients showed stronger ERS.
